# Supplementary material
Source: PubMed Central journal article supplement (PMC6026221)
Supplement: mmc1.pdf [file mmc1.pdf]

## Use of Mycophenolate Mofetil or Azathioprine for the Management of Chronic Hypersensitivity Pneumonitis

*Julie Morisset, MD; Kerri A. Johannson, MD; Eric Vittinghoff, PhD; Carlos Aravena, MD; Brett M. Elicker, MD; Kirk D. Jones, MD; Charlene D. Fell, MD; Helene Manganas, MD; Bruno-Pierre Dubé, MD; Paul J. Wolters, MD; Harold R. Collard, MD, FCCP; Christopher J. Ryerson, MD; and Brett Ley, MD*

CHEST 2017; 151(3):619-625

*Online supplements are not copyedited prior to posting and the author(s) take full responsibility for the accuracy of all data.*

© 2016 AMERICAN COLLEGE OF CHEST PHYSICIANS. Reproduction of this article is prohibited without written permission from the American College of Chest Physicians. See online for more details. DOI: 10.1016/j.chest.2016.10.029

**e-Table 1.** Comparison of baseline characteristics between the UCSF patients included in the study and those excluded due to lack of follow-up

| <b>Characteristics</b>             | <b>Included patients<br/>(n = 38)</b> | <b>Excluded patients<br/>n=30)</b> | <b>p-value</b> |
|------------------------------------|---------------------------------------|------------------------------------|----------------|
| Mean age (SD), years               | 60.7 (12.3)                           | 67.5 (8.86)                        | 0.009          |
| Male - n (%)                       | 23 (60.5)                             | 13 (43.3)                          | 0.158          |
| Ever smoker - n (%)                | 16 (42.1)                             | 18 (60.0)                          | 0.143          |
| Surgical lung biopsy - n/total (%) | 31 (81.6)                             | 15 (50.0)                          | 0.006          |
| Identified exposure - n/total (%)  | 17 (44.7)                             | 15 (50.0)                          | 0.666          |
| PFTs at MMF or AZA initiation      |                                       |                                    |                |
| Mean FVC % predicted (SD)          | 66.8 (16.9)                           | 68.2 (15.2)                        | 0.724          |
| Mean DLCO% predicted (SD)          | 49.2 (15.5)                           | 48.3 (13.6)                        | 0.803          |

Abbreviations: PFTs = pulmonary function tests; MMF = mycophenolate mofetil; ZA = azathioprine; FVC = forced vital capacity; DLCO = diffusing capacity for carbon monoxide.
